# Supplementary material for: The SlHB8 Acts as a Negative Regulator in Stem Development and Lignin Biosynthesis
Source: MDPI journal article supplement (doi:10.3390/ijms222413343), 2021-12-12
Supplement: s1 [file s1]

**Table S6.** SIHB8 binding sites analysis of the promoters of SICYP73A14 and SIPER3

3000bp promoter sequence of transcription start site of SIPER3

>SL2.50ch05:58100304..58103303

ACACTTATACTATACTAAGGTCCTATTACCCCCCTAAACTTATTTTATGTGTAATTTTCTACCC  
CTTTTGTAGCCTACGTGGCACTAGTTCGAAAAAAAAGTCAACCATTGTTGGACCCACAAGAT  
AGTGCCACGTAAGCTAAAAAGGGGTAAAAAATTATTAATAAAATAAGTTCAGGGGGGTAAAT  
AGGACCTTAGTATAGTATAAGTGTGTCTCTGAGATTTCGGGCATAGGTTGAGGGGTACTTGG  
GCATTATCCCTATATTAAATTTGATACTTTGAGAAATATATTAGATATCAAATAGTTATATTTAAT  
TTCAAAGATAAAATAGAAAAAAAATTATGTCTAAGGTGAATAAGTTTATTGGATAACTATGGT  
AATGCTGAACTGCCAGAAAATTTGGCTATACATTGAAAAATTCTATTATATCTTTTTAAATTTT  
AAAATAAACTGATCTTTTTTCAACTTTTTGATTAAAAAGTAAAAATGTGCAAAAATAAATAC  
AATAACATAGTGTTAAATATATTATCTAATCATTTTGATCAAATTCTAACTAAATTTTTTGACTA  
ATTTCTTTTTCCATTTCTAATATAATAAAATAAATAAATAAAGATAAATAGAGTATAAAAAGTTCT  
CCTTTATAAATATATACATAAAAAATATAATAGAAACATGAAGGTCCCCCTACCCTTGTATACAA  
CAAGGAAAACAAATTCTGGGAACAGTAACCAAATTACTTAATTATGAGTATATGGTCAATGT  
CTTATCTGCCAGCAATTGCTTGATACAACCTGTTAATAACTACTTCCTCCCTCTAACTCATTTT  
TTCATTTTTTTTAAAATCAAATTGATAATCATTAATACTTAATTGAATCAGATCAATTCAACATT  
TTAAAATTTTGATAATTAATACTATACTAAAAGTCCATATTAATACTATACTAAAAGTCCATA  
AGTCCATGTTCAATTTTTTTTTTGA<sup>AAATTAAA</sup>CAGTTTTTCCGCATTTTTTTATTAATAATCAAA  
TCTCAATTATGACTCAAATCTAATGTATATCCTTACATTATCTAAGTGAAGTTAAAACATCCTT  
ATATTATCCAAAATATAACAAGAATCAACCTTCAGTCTATTTTTGTAAAAAACTAATTGAAC  
CAATAAAAATAAATTTGATCATGTGTTAGCAACAAAAGAGAAGATACAAGTACCTTCAAA  
AAAAAAGTACCTTAAAAAATATGGATATGAATTGAAAATGATTATTTTATTGTCATAATTTA  
ATTTTTTTGCGTTTTTAATTTATATGTTTTTTGCATCATCAAGTAAATTGACTTGCAACAATAC  
ATAAGTTTTGAAATATTTATATATTAGATTACGATGATTAGAGAGATTATGTAAAAAAAATTA  
TTTTAAAAATATTATGTTCAACTAATTAGAGACTTTCTTTAATAAAATATTTAGTATGTGTACTA  
TATGTATATAATAAAATTCACATTTTATACAATGTAAAAAATACTGAAAATTTAGTGAAATTA  
CGTAGGCATTTGGTTATGA<sup>AAATTAAA</sup>AAAAATAAATTACTTTTGTTGAAAATTTTAAAGTT  
GGAGCTGTATTTGGCTATACTTTTTACAAAGAATATTCAGAATTTGAATATATTTTGTCTTAAT  
ATGATTTAACTTTCAATTTCTAAAAGTTGCACTTGACACATTTTTTTGATTGCTTGAGCTTT  
TAAAAAAAATAGAGAGAAGGATTGCAACTTTTTGAATAATTTAAGGATATTTTTTTGTTCATT  
ATGTAACACAAGGATGTACTTTAAATTTATGTCATACTTCAAGAATGATTTTAGCCAAAACT  
CTAATTTGTACAATTTATATGAAACCTTAATCTAACTGTTTCAATTTTGAGAAAACGTCAAAC  
AAGTAGCAAAGTAATAATGAATTGATGTGGACATATGTCAAAAGCATATTTGCATATGAGAAT  
ATATGTGAGTTGTCCTGGCTCCTACATATAATTTCTGATACAACCTTGAGGAGCAGGTGAGTTT  
TTCTATTTTTCAATTCCAATAATACCAACCATAAAAGCACAAAACAATTAACCTGATCAAGA  
AAATGATAAAACACAAAGATTTTCGTTTATTTATGTGTGCGAAAAACAAATAAGTAATATATAT  
ATATATATTTTTTTGGAGAGAGAGTTAAATATATATCTAAGAATTCACGTAAAACATCTAAATTC  
AGGATTAATCATGTTACATATGTATATGGGGAAAAAATACAAGTCTTTTGTGTTGTTGGTAA  
AATGGAAAAATAAAAAATTAATAAAAGTTCTTAAAGTGTCCATAAACAACCGGACTTAAATC  
TACTAAAACAAATTTTATGTCATTTATTAAGTGCATTCATTGTAACAAAATTAACTTTTAGGG  
GTAATAATATGCATATTAATAAAGAGTAAAAATTTATCGCATTAGTGTATCATTGGACGCAAT  
ATCCTTATTAGCTTTAGAGATATTTACAAAACTGTTAATTACGTCTACAAAAATATACAGTG

ATAATTAAGTTGTTACCATTGACGACTTATTATCGCTAACGATCACAAGTAATTATAGAGTATT  
AGAGACTCTTCATATTTGTAGCTATCATTTACTAGAAAATCGACACACTTCGGACCTGTTTGG  
ATTGACTTTTGACTTGTGACTTATAAGCCACAAATCATAAATTAGAATTTTAACTTATGACT  
TTTGACTTATTTTTTTTATTTTGGCTTTAAAATAATTGTTAATAAGCATTTTTAACTTATGCAA  
ACATTTCAAAAGTCTTAAAAGTTATTTTAGCTTAAAAGCACTTAAAATAAGTCAATCCAAA  
CGGACTTAATCGTAACCTTATTTAAAATGAAGGATACTAGTGGGAGTATTTATGCATGGAAG  
AGGGAAGATGGCCAAACAAAATATGAATATTTATTACCGAAAGAGTACGACAGACTAACTAT  
TTAATTAATCAATCAACCAAACAAACAA

3000bp promoter sequence of transcription start site of SICYP73A14

>SL2.50ch05:59020065..59015066

ACAAATTTAGATATG**TAAATGTAT**GTTGGAAAAATATATGGATTAATACTTTTTAATAAGTAAT  
TACTGATTTTAGCGACTTTTCTTTAGGTTAAATTCATGGGTGGCTCCCTAATCTTGGCACCA  
ATTTTCACTTAAGTTCCTCAATTAGGCAATTTTCATTTTAGACACCTCATGTAGGGTCTATTT  
TGTCATTTTGACATTTTCTAACAATAAAATAAAAACTAAAGGAGAGTGTAATACGCTTGTT  
GATGACGTGACAAACAATCAATTAAATAATTATGTGTGTTATTTTCAATTAATAATAATTATAA  
AAATCTATTTAGTAAAT**AAATTAAA**ATATTATTCTAAGAAAATCTCTATTTCACTACACTCAA  
ATCTATTTTGTGTTTTCTCAAAAAAATATTTTTTCTTTTACTATTTTCATATTTATTCATCTT  
CTTTCTTTTAGTATTGTTTTTTGGAAAGAAAAGAGGGAGAGGAAGAAAGAGAAGAGAATA  
AATATGAAATATGGGTGTTGGTATCCATTTTTTTGGCAAAATATGGAGGAATGTGATGATAGA  
TTTAGATAAGTAATACGATGAAGAAGAAGAAAATGACTTAAAAATGAACTTGAATAAAAAA  
TTTGACCTCCATTGAAGGAATTTAAGCTTGAAAAAAGGATAGGGGGTGGTGGCTTGAAAAA  
TGGAGAAGAAGAAGAGAAAATA**AAATTAAA**AATGGCTAAATTAAGTCTTTCACGCGATATT  
GTTGAGTATATCTCACTCACTTTGACATGTTAGCGAAAAATGTCAAAATGATACAACAGAAC  
CCTACATGAGGTGTCTAAAATGAACATCGCCTAATTGAGGTGTTAAGTGAAAATTGGTGCC  
AAATTTAGGGGGTCACCGATAGATTTGGCCTTTTATTTATCACCATTATAGTAACACATAAC  
AATACTATGTTAAATCTGCAATATGTATTAAGTAATTTATGTATGCAATATATATGTATTATA  
ACTGTTTTTTAACTATATTATGCTTGTTTGAAAAGAAATTGACATATTGTATTATATGAGTATT  
AAAATGTGTGA**TAAATGTAT**TAACCATCAATAACGCTACTATATGTGAATAACATATTCTTCTT  
TGTAATATACATTAAAATTGTATAATAAATGAACTAGTAAAAATACCCGCGTTTCGTGCGGGA  
GTTAAATATTACAAAATTATAAAATAATACTTAAAGTACATCGGTCATTAAACCTAAAATTCT  
ATATTCTCTTACACACAAGATTATGTAGTAAGAATCATTAACGATGTAAAGGAACATAAAAAAT  
TATTGCATCTTATCATTTATCCTTAATAATATAAGCATAAACTAATGAGTGTAACAATACATACC  
AGGATCTGTGAGATAAACAATGATGCTTGTTAGCCACTCAACAGGAGCAAGATACATAAATA  
TTTAAAGAAGAAGGTTTAAATTTTTATTTTTTTTAAATGGGAGGAAAACCTCACTATTTAT  
TGTGTGAACAAAGGGTAGTGTGGAAGAATATTTATTGTGGCTTATCGAAAAGTTACAACATAA  
TTGGAAGAAAGTTACAATCCTTCATTAATGTCACAATCTTTCAGAAAAATCACAACCTTTTCATA  
AGAATCGCAACTCTTTATTAAATCACAACCTTTTCATAAAAGTCGCAATTCTTTATAAAAAATCG  
CAACTCTTCATTAATGTCGCGATTTTTTATAAAAGTCACAACATCCATAAATATCACAACCTT  
TCATGAAAGGTGAAGGTAGTTTTGTAAATAAATTAATTAAGAGAATTCTTGTTTGTGGT  
GGCGCCACGTAGGCGTGCCTAAGATTCTCTTTTATATAATTATATGATATGATTAAAAATGATC  
AGGTGAAAAAATATTATTGTATAACTGATAAATATTTTTATAATGTAATATATTTATGTAAGT  
TTCCCGAAACCTATACATTTTGGGTTTTATATAATGAATTGATGATGAATTTGTTTGGTTATAC  
CCAAAGAATTAGACATAAGAATATATGTGGTATAATGTTTTAACTTCTACTTGTTTTAAAAAAT  
ATTAAAAATTAATCGATTTGTATCAATGTTAAAAAGAAACCAAGATAATGAATTGGTTTCAA  
GAAAAAA**AAATTAGT**TATACAAATCAATTAATAAAAAATTAATTTAAGATAAATTTTATAAA  
ATAACTACGTAACAATATCATTGACACCTTAATTACTTTTCGTTATAATCTAAATAATTTTGT  
GAATATATGGAATCGTATTTATCACTCGAATTAGGCTAGTAGATATGTCATAATACCAAATATT  
TGTTGATTACATTTAGTAATCTTTATCATGTTATGTATTAATGTTTATTATTAATAAAAAAATATC  
TATAATTACTCAAATTTGACCTTATTATATAGAATCAACTCTTGCTTTTTATATTAGTGGCAG  
CCATCTTAAATGTGGAACTTTAAATGGAATTAGTTCAAGACCAATTGGATTCTTTAATCT  
CTCATTGGACATAAATTTTGAAGTAGTCGATTTGAACATCCGTTTTACTTAGAAAAAATTTG  
AAATTATGTGAATAAAAGTAAAATTTCTCAAATAAGGTTTTGAAAAAATAAAAAATATTCG

AAGATCAAATATTCAAATCTAAAAAAATCAAATGATTCATGGCTAAATTAATATTTAAAAA  
TAACTTTTTAAAATTTGAATTTACGATCAAACGATAGCTTACCTATGACATTAAGATTACGTA  
GAAAAAATGTTTAAATGTAGATGAATGACATTTTGGCTTTACCAAACATGAATCTACTAGTT  
TTGACTTGATTAATAGATAGCCACTATATACATTCTCCTACCTAGAATTTGAACATGCCCATGG  
ATTATACACAAAACCATTTGACAACAACTTTCCTACCCCCACCATGTTGTCAATTTTACTTC  
ATATATATACACATAATTAACACCTTATGC
