# Supplementary material for: The SlHB8 Acts as a Negative Regulator in Stem Development and Lignin Biosynthesis
Source: MDPI journal article supplement (doi:10.3390/ijms222413343), 2021-12-12
Supplement: s1 [file s1]

Table S1. Summary statistics of RNA-seq data of the 9 libraries mapped to the tomato reference genome (*Solanum lycopersicum* ITAG4.0).

| Samples                            | WT                   |                      |                      | SIHB8-ox             |                      |                      | SIHB8-cr             |                      |                      |
|------------------------------------|----------------------|----------------------|----------------------|----------------------|----------------------|----------------------|----------------------|----------------------|----------------------|
| Library                            | WT-1                 | WT-2                 | WT-3                 | HB8-ox-1             | HB8-ox-2             | HB8-ox-3             | SIHB8-cr-1           | SIHB8-cr-2           | SIHB8-cr-3           |
| Clean reads                        | 50428308             | 49843612             | 53550906             | 49366488             | 45490476             | 39049388             | 43901952             | 63555660             | 49914082             |
| High quality<br>clean reads<br>(%) | 50336792<br>(99.82%) | 49761328<br>(99.83%) | 53457896<br>(99.83%) | 49276912<br>(99.82%) | 45419064<br>(99.84%) | 38982904<br>(99.83%) | 43826050<br>(99.83%) | 63450750<br>(99.83%) | 49845336<br>(99.86%) |
| Removed<br>rRNA reads<br>(%)       | 50188458<br>(99.71%) | 49628866<br>(99.73%) | 53313056<br>(99.73%) | 49143478<br>(99.73%) | 45302194<br>(99.74%) | 38879150<br>(99.73%) | 43712426<br>(99.74%) | 63292294<br>(99.75%) | 49710888<br>(99.73%) |
| Mapped reads<br>(%)                | 48861307<br>(97.36%) | 48326637<br>(97.38%) | 51861046<br>(97.28%) | 47706778<br>(97.08%) | 44064712<br>(97.27%) | 37727049<br>(97.04%) | 42601874<br>(97.46%) | 61843685<br>(97.71%) | 48411175<br>(97.39%) |
| Unique<br>mapped reads<br>(%)      | 47717462<br>(95.08%) | 47197528<br>(95.10%) | 50647131<br>(95.00%) | 46514713<br>(94.65%) | 42962616<br>(94.84%) | 36785345<br>(94.61%) | 41597363<br>(95.16%) | 60333093<br>(95.32%) | 47246911<br>(95.04%) |
| Multiple<br>mapped reads           | 1143845<br>(2.28%)   | 1129109<br>(2.28%)   | 1213915<br>(2.28%)   | 1192065<br>(2.43%)   | 1102096<br>(2.43%)   | 941704<br>(2.42%)    | 1004511<br>(2.30%)   | 1510592<br>(2.39%)   | 1164264<br>(2.34%)   |
| All genes                          | 22546<br>(64.97%)    | 22534<br>(64.94%)    | 22644<br>(65.25%)    | 22568<br>(65.03%)    | 22414<br>(64.59%)    | 22265<br>(64.16%)    | 22447<br>(64.69%)    | 22885<br>(65.95%)    | 22593<br>(65.11%)    |
| Known genes<br>(%)                 | 21968<br>(64.47%)    | 21961<br>(64.45%)    | 22063<br>(64.75%)    | 21985<br>(64.52%)    | 21831<br>(64.07%)    | 21681<br>(63.63%)    | 21870<br>(64.18%)    | 22307<br>(65.46%)    | 22016<br>(64.61%)    |
| Novel<br>transcripts               | 578                  | 573                  | 581                  | 583                  | 583                  | 584                  | 577                  | 578                  | 577                  |
