# Supplementary material for: The SlHB8 Acts as a Negative Regulator in Stem Development and Lignin Biosynthesis
Source: MDPI journal article supplement (doi:10.3390/ijms222413343), 2021-12-12
Supplement: s1 [file s1]

**Table S5.** List of primer sequences of genes used in the qRT-PCR and vector generation.

| Primers for qRT-PCR                |                           |                               |
|------------------------------------|---------------------------|-------------------------------|
| Primers for qRT-PCR                |                           |                               |
| Gene Name                          | Forward (5'-3')           | Reverse (5'-3')               |
| <i>SIWRKY28</i> (Solyc01g079260)   | CGCCAATCAGTCCTTCAACG      | ACGCCTTCCTTGAGCAACAA          |
| <i>SIGRAS4</i> (Solyc01g100200)    | TTGTAGCAGCAGCATTTTGGA     | CTGCACGTCAAGTGAGAGAAA         |
| <i>SILPL18</i> (Solyc02g093580)    | ACGATGACTAGTTGACGATAGTG   | AAACGATGAGATATAAGTTTTCGA      |
| <i>SISAP1</i> (Solyc03g007760)     | GACTAAACCAGGCGAGCGTA      | TCTCAGCTGCAGGTAAACCG          |
| <i>SIPAR-1c</i> (Solyc03g025670)   | GGCCCAGTTGATAGCATATAGT    | CAATAATAGATGCATTCTCCACCT      |
| <i>SIPAL</i> (Solyc03g042560)      | ATGTTGATGATCCTTGACGCTC    | TCGTCCTCGAAAGCTCCAATC         |
| <i>SINAC081</i> (Solyc04g009440)   | ATCGACACCAGCAAACGACT      | CACATGGCGACAAGACATGC          |
| <i>SIZOG1</i> (Solyc06g062330)     | TCCGCTACAGGCGGTTTTTC      | CAGTCATAGGCATAGTGCCA          |
| <i>SIEBF2</i> (Solyc07g008250)     | TTGTGATGCTCCAGTGCGCTT     | CGTGTGAAACCGGAGACTGA          |
| <i>SIERF4</i> (Solyc07g053740)     | TGTGTCGGATTCGCTCTCCG      | CCATAGGTGGCGCAAGGTTA          |
| <i>SlbHLH128</i> (Solyc09g098110)  | ACTGCTGCAGGTGATACTGTT     | GAGCTGAGAGTTCAGCCTTGT         |
| <i>SILSH10</i> (Solyc10g008000)    | CACCAGCTCCCTGTACTTGT      | GCGAATGGGTTGGTCTCACT          |
| <i>SIDIR21</i> (Solyc10g055200)    | TACGTCTCATTCGCTACGG       | TGAGCTCGACCAATAGTCGTT         |
| <i>SIEBF2</i> (Solyc12g009560)     | TTGTGATGCTCCAGTGCGCTT     | CGTGTGAAACCGGAGACTGA          |
| <i>SIZSD1</i> (Solyc12g056600)     | GTCACTGTCTTACTTTATGTACACG | AACGGTAATGTAATACTCCAAATCG     |
| <i>SIHB8</i> (Solyc08g066500)      | CGTGGAGCTGCTCAAATCTG      | CTGGCAGTGCCTTCATAGAG          |
| <i>SICCR1</i> (Solyc06g068440)     | GCTGGAGCGATCCTGATTTT      | ATATGAAGAACACTAGCATTCACAGTATT |
| <i>SICYP73A14</i> (Solyc05g047530) | TTGTGTTCAAGCCTGTTGCTG     | GTGTTGTTGTAAAGGCACAGAGT       |
| <i>SICCR2</i> (Solyc03g116910)     | AGTCTGCAGGAGAAGGGTCA      | TTCATAAGCACACGCAGTAGC         |
| <i>SICCoAOMT5</i> (Solyc10g050160) | GCCCTTGCTATCCCCGAAG       | TCAAGAAGGGGCAAAGCAGG          |
| <i>SIC3H</i> (Solyc01g096670)      | CAACTTTGTGCCTCAAGTCCAAT   | CCAATGTCTTTAACCAACCAGAAAC     |
| <i>SICAD</i> (Solyc01g107590)      | ACCTAAGCAATGTCTTGCCCT     | GGAGAATAGTTCAAAGGGAATGGA      |
| <i>SICOMT</i> (Solyc03g080180)     | ACTCCCTTGTAAGAACCCAGATG   | CACCATCGGCATTCTTAGTCA         |
| <i>SIHCT</i> (Solyc03g117600)      | CTCCCTTTTCTTAATCCAGGTAAC  | CATGGCAAAAGGGTCTGCTA          |
| <i>SIPER3</i> (Solyc05g046020)     | TGCTGAATTTGCTCAATCAATGG   | ACATATTGCCCCAAACCAAGA         |
| <i>SIUBI</i> (Solyc01g056940)      | CCAAGATCCAGGACAAGGAA      | CCAAGATCCAGGACAAGGAA          |

| Primers for Dual Luciferase Assay |                                          |                                              |
|-----------------------------------|------------------------------------------|----------------------------------------------|
| Primers for Dual Luciferase Assay |                                          |                                              |
| Gene Name                         | Forward (5'-3')                          | Reverse (5'-3')                              |
| <i>ProSIPER3</i>                  | tataggcgcaattgggtaccGAAGGTCCCTTACCCTTGAT | tatgttttggcgtcttccatggTAGGAGCCAGGACAACCTCACA |
| <i>ProSICYP73A14</i>              | tataggcgcaattgggtaccTGGCTCCCTAATCTTGGCAC | tatgttttggcgtcttccatggTCTTGCTCCTGTTGAGTGCC   |
| <i>SK-SIHB8</i>                   | cgggctgcaggaattcATGATGGCTGTGACATCAAGCT   | cgggtatcgataagctTCAGACAAAAGACCAATTGATAAAC    |
