# Supplementary material for: The SlHB8 Acts as a Negative Regulator in Stem Development and Lignin Biosynthesis
Source: MDPI journal article supplement (doi:10.3390/ijms222413343), 2021-12-12
Supplement: s1 [file s1]

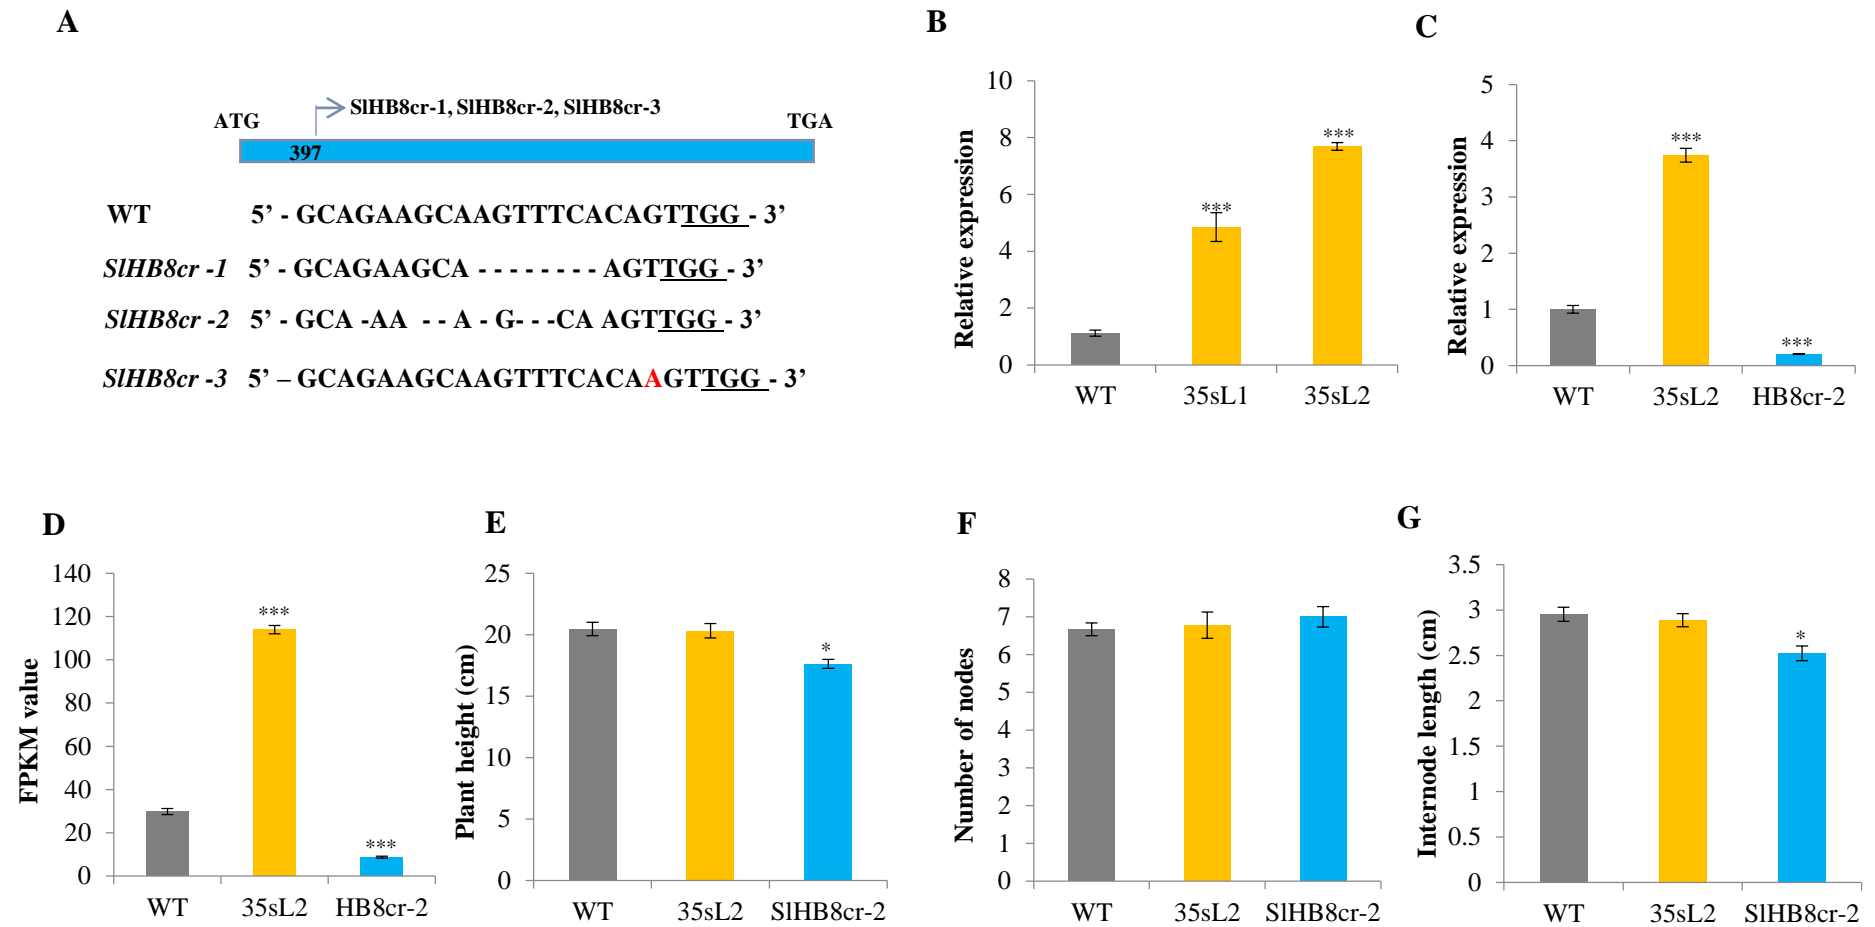

**Figure S1.** (A) Three kinds of SIHB8 gene editing plants by using CRISPR/Cas 9 system. (B) Quantitative reverse transcription PCR analysis of SIHB8 genes in leaves of SIHB8 overexpression lines as well as wild type plant. (C) Quantitative reverse transcription PCR analysis and RNA-seq analysis (D) of SIHB8 genes in stem of SIHB8 overexpression lines, SIHB8 knock out line and wild type plant. Measurement of the plant height (E), number of nodes (F) and internode length (G) of SIHB8 overexpression, SIHB8 knock out lines and WT plants. Error bars mean  $\pm$  SE value for each line. Stars indicate the statistical significance using Student's t-test: \* p-value < 0.05, \*\* p-value < 0.01, \*\*\* p-value < 0.001.

**A**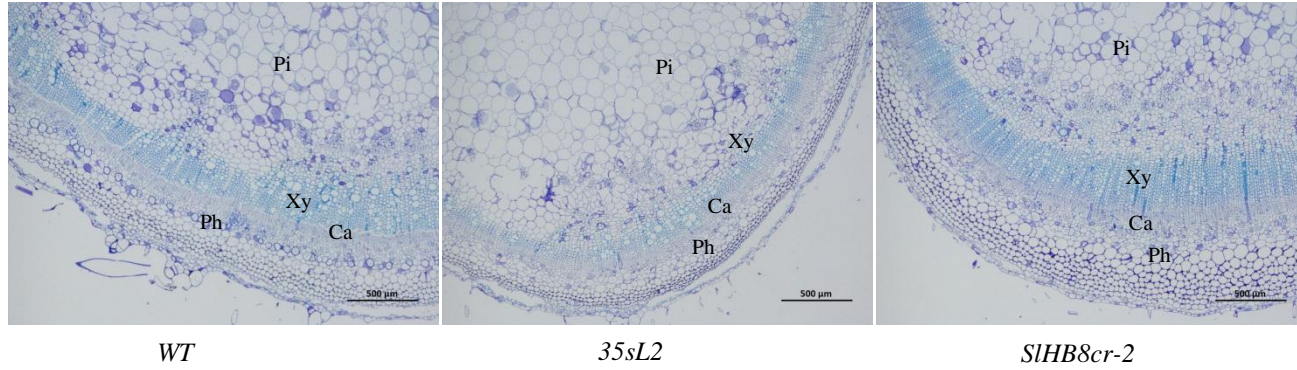**B**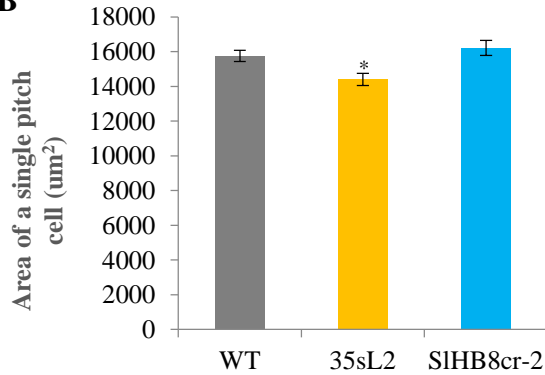**C**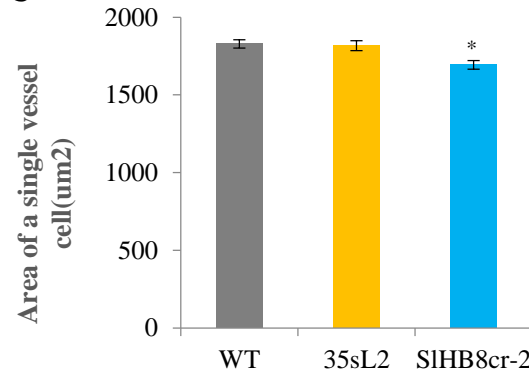

**Figure S2.** Characteristics of stem cells from paraffin sections of SIHB8 overexpression and SIHB8 knock out lines as well as WT plants. . (A) Cross-sectioning and staining with toluidine blue of the 6th internode of 2-month-old wild-type, SIHB8 overexpression and SIHB8 knock out lines. Pi, pith; Ca, cambium; Ph, phloem; Xy, xylem. Bars: 500um; The area of a single pitch cell (B) and the area of a single vessel cell (C) in the stem and xylem of SIHB8 overexpression and SIHB8 knock out lines as well as WT plants. The calculation was performed on Image J softer ware based on the images of toluidine blue-stained anatomical sections as described in the Materials and Methods section. Error bars mean  $\pm$  SE value. Stars indicate the statistical significance using Student's t-test: \* p-value < 0.05, \*\* p-value < 0.01, \*\*\* p-value < 0.001.

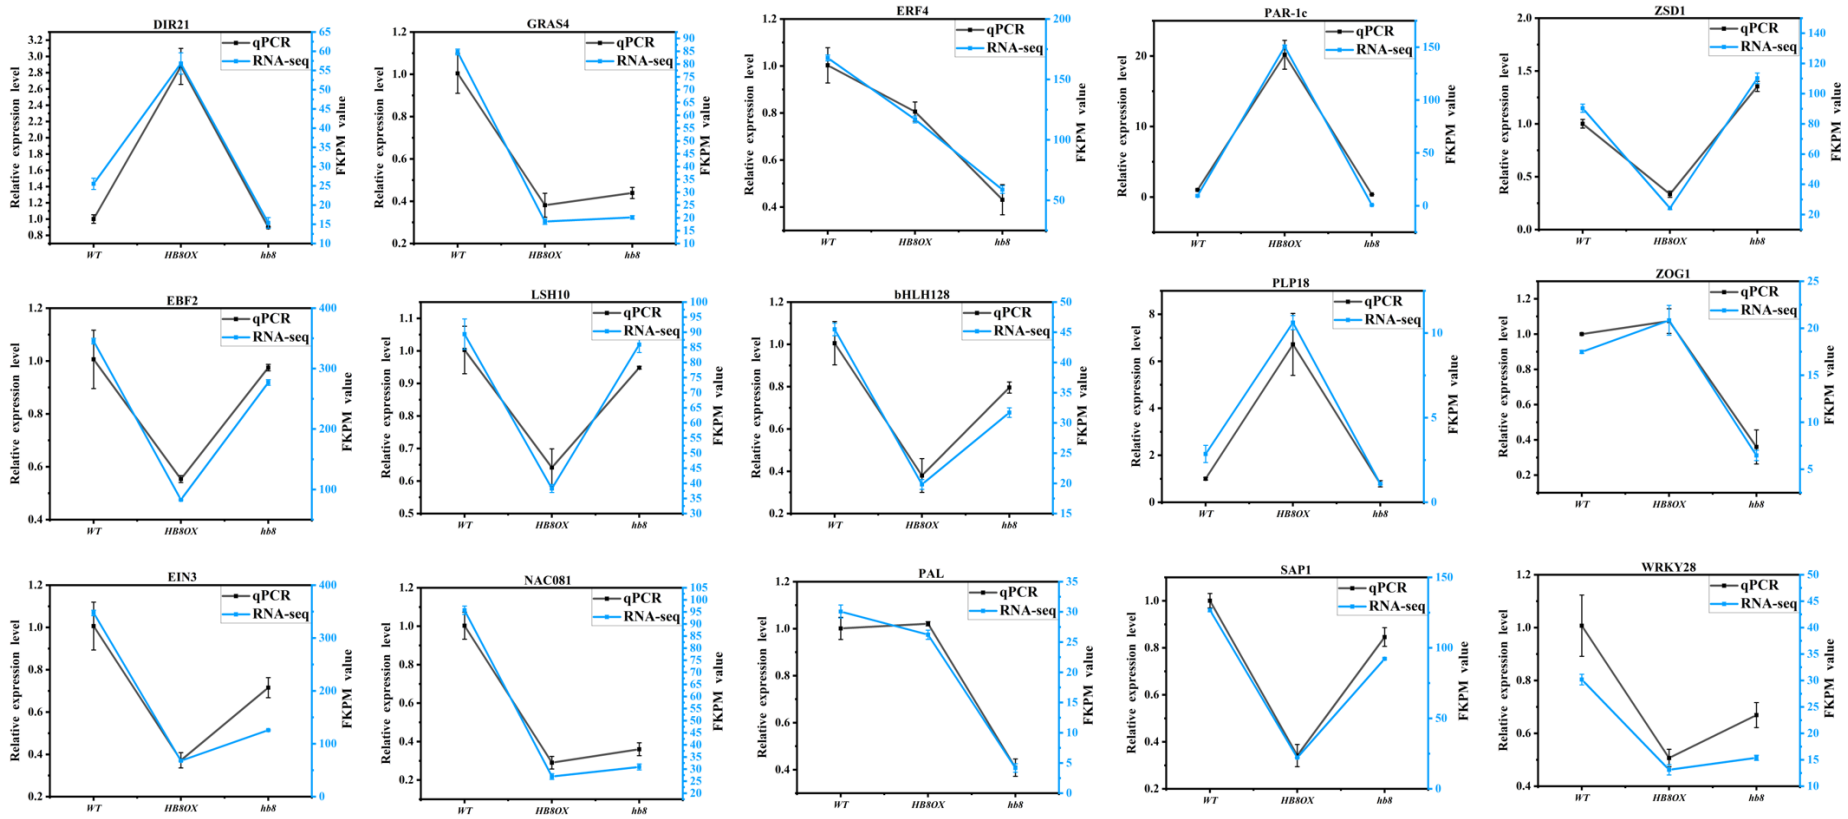

**Figure S3.** Validation of the expression data from RNA-seq assay by quantitative real-time PCR (qRT-PCR). Relative expression levels of eight genes determined by qRT-PCR (black) and FPKM obtained by RNA-seq (blue). Results for each gene are based on three biological and three technical replicates. Error bars indicate standard error.
